# Supplementary material for: Temperature- and moisture-dependent studies on alunogen and the crystal structure of meta-alunogen determined from laboratory powder diffraction data
Source: PubMed Central journal article supplement (PMC5306069; doi:10.1007/s00269-016-0840-7), 2016-09-19
Supplement: 269_2016_840_MOESM1_ESM.pdf [file 269_2016_840_MOESM1_ESM.pdf]

Hydrogen bonds within the structure of meta-alunogen resulting from the predicted hydrogen positions: distances in (Å) and angles in (°).

| D-H...A          | d(D-H) | d(D...A) | d(H...A) | <(DHA) |
|------------------|--------|----------|----------|--------|
| O13 -H131 ...O3  | 0.900  | 2.506    | 1.625    | 165.38 |
| O13 -H132 ...O1  | 0.900  | 2.495    | 1.619    | 163.36 |
| O14 -H141 ...O4  | 0.900  | 2.462    | 1.611    | 156.47 |
| O14 -H142 ...O6  | 0.900  | 2.834    | 2.030    | 147.97 |
| O15 -H151 ...O7  | 0.900  | 3.229    | 2.474    | 141.77 |
| O15 -H151 ...O8  | 0.900  | 2.959    | 2.124    | 153.96 |
| O15 -H152 ...O10 | 0.900  | 2.693    | 1.886    | 148.10 |
| O16 -H161 ...O11 | 0.900  | 3.080    | 2.335    | 140.08 |
| O16 -H161 ...O12 | 0.900  | 3.316    | 2.649    | 131.68 |
| O16 -H162 ...O18 | 0.900  | 2.687    | 2.494    | 92.46  |
| O16 -H162 ...Ow2 | 0.900  | 2.090    | 1.771    | 97.55  |
| O17 -H171 ...O4  | 0.900  | 2.786    | 1.945    | 154.74 |
| O17 -H172 ...O3  | 0.900  | 2.614    | 1.799    | 149.38 |
| O18 -H181 ...O8  | 0.900  | 2.309    | 1.562    | 137.69 |
| O18 -H182 ...O12 | 0.900  | 2.553    | 1.965    | 121.50 |
| O18 -H182 ...Ow2 | 0.900  | 3.440    | 2.626    | 150.95 |
| O19 -H191 ...O5  | 0.900  | 2.727    | 1.950    | 143.64 |
| O19 -H192 ...O6  | 0.900  | 2.611    | 1.806    | 147.52 |
| O20 -H201 ...O1  | 0.900  | 2.830    | 1.949    | 165.79 |
| O20 -H201 ...O23 | 0.900  | 2.485    | 2.307    | 90.61  |
| O20 -H202 ...O7  | 0.900  | 2.798    | 1.925    | 162.92 |
| O21 -H211 ...O5  | 0.900  | 2.492    | 1.755    | 137.25 |
| O21 -H212 ...O7  | 0.900  | 2.630    | 1.827    | 147.44 |
| O22 -H221 ...O9  | 0.900  | 2.838    | 2.173    | 130.23 |
| O22 -H222 ...O19 | 0.900  | 2.801    | 2.640    | 90.82  |

|                  |       |       |       |        |
|------------------|-------|-------|-------|--------|
| O22 -H222 ...Ow1 | 0.900 | 2.395 | 1.997 | 105.12 |
| O23 -H231 ...O2  | 0.900 | 2.583 | 1.814 | 141.87 |
| O23 -H231 ...O4  | 0.900 | 3.145 | 2.367 | 144.74 |
| O23 -H232 ...O11 | 0.900 | 2.604 | 1.765 | 153.90 |
| O24 -H241 ...O2  | 0.900 | 2.617 | 1.777 | 154.19 |
| O24 -H242 ...Ow1 | 0.900 | 2.915 | 2.406 | 115.96 |
| Ow1 -Hw11 ...O10 | 0.900 | 2.677 | 1.788 | 168.94 |
| Ow1 -Hw12 ...O9  | 0.900 | 2.463 | 1.628 | 152.81 |
| Ow2 -Hw21 ...O11 | 0.900 | 3.104 | 2.636 | 113.23 |
| Ow2 -Hw22 ...O12 | 0.900 | 3.168 | 2.544 | 126.93 |
| Ow2 -Hw22 ...O16 | 0.900 | 2.090 | 1.883 | 90.18  |
